# Supplementary material for: The Study of Cerebrospinal Fluid microRNAs in Spinal Cord Injury and Neurodegenerative Diseases: Methodological Problems and Possible Solutions
Source: MDPI journal article supplement (doi:10.3390/ijms23010114), 2021-12-22
Supplement: s1 [file s1]

**Table S1.** miRNA expression in spinal cord and cerebrospinal fluid at different periods post-injury.

| <i>Organism /<br/>Type of SCI</i>          | <i>miRNA</i>                                                                                                                                                                                                                                                                                                        | <i>Expression<br/>changes/Period<br/>post-SCI</i> | <i>Targets</i>                                                                                                                                                                                          | <i>Potential effects</i>                                                    | <i>References</i> |              |                                                                         |  |      |
|--------------------------------------------|---------------------------------------------------------------------------------------------------------------------------------------------------------------------------------------------------------------------------------------------------------------------------------------------------------------------|---------------------------------------------------|---------------------------------------------------------------------------------------------------------------------------------------------------------------------------------------------------------|-----------------------------------------------------------------------------|-------------------|--------------|-------------------------------------------------------------------------|--|------|
| SPINAL CORD                                |                                                                                                                                                                                                                                                                                                                     |                                                   |                                                                                                                                                                                                         |                                                                             |                   |              |                                                                         |  |      |
| Adult female<br>SD rats / T10<br>contusion | miR-137<br>miR-235-3p<br>miR-124<br>miR-30b-3p<br>miR-99<br>miR-181a<br>miR-127<br>miR-411<br>miR-99a<br>miR-30c, miR-30b-5p, miR-384-5p<br>miR-34a<br>miR-145, miR-214, miR-133a<br>miR-672, miR-103, miR-206, miR-133b<br>miR-107, miR-20a, miR-17, miR-674-5p<br>miR-152<br>miR-221<br>miR-1, miR-206<br>miR-214 | ↓ 7 days                                          | Caspase 3; Calpain2<br>Caspase 3<br>Calpain 1<br>AIF<br>Calpain 3<br>cPLA2<br>sPLA2<br>TNFα<br>TNFα; ICAM1<br>IL-1β<br>ICAM<br>Bcl2-1<br>Bcl2-2<br>Catalase; Bcl2-1<br>ANXA1<br>ANXA2, SOD1<br>Catalase | pro-apoptotic role                                                          | [16]              |              |                                                                         |  |      |
|                                            |                                                                                                                                                                                                                                                                                                                     |                                                   |                                                                                                                                                                                                         | inflammatory related                                                        |                   |              |                                                                         |  |      |
|                                            |                                                                                                                                                                                                                                                                                                                     |                                                   |                                                                                                                                                                                                         | anti-apoptotic role                                                         |                   |              |                                                                         |  |      |
|                                            |                                                                                                                                                                                                                                                                                                                     |                                                   |                                                                                                                                                                                                         | anti-inflammatory related                                                   |                   |              |                                                                         |  |      |
|                                            |                                                                                                                                                                                                                                                                                                                     |                                                   |                                                                                                                                                                                                         | anti-oxidative factor                                                       |                   |              |                                                                         |  |      |
|                                            |                                                                                                                                                                                                                                                                                                                     |                                                   |                                                                                                                                                                                                         | anti-inflammatory related or anti-oxidative factor                          |                   |              |                                                                         |  |      |
|                                            |                                                                                                                                                                                                                                                                                                                     | ↑ 7 days                                          |                                                                                                                                                                                                         | cell cycle                                                                  |                   | [27]         |                                                                         |  |      |
|                                            |                                                                                                                                                                                                                                                                                                                     |                                                   |                                                                                                                                                                                                         | differentiation of cells                                                    |                   |              |                                                                         |  |      |
|                                            |                                                                                                                                                                                                                                                                                                                     |                                                   |                                                                                                                                                                                                         | cell cycle entry could ultimately lead to significant neuronal death        |                   |              |                                                                         |  |      |
|                                            |                                                                                                                                                                                                                                                                                                                     |                                                   |                                                                                                                                                                                                         | anti-inflammatory related and promotion of cell proliferation               |                   |              |                                                                         |  |      |
|                                            |                                                                                                                                                                                                                                                                                                                     |                                                   |                                                                                                                                                                                                         | anti-apoptotic role                                                         |                   |              |                                                                         |  |      |
|                                            |                                                                                                                                                                                                                                                                                                                     |                                                   |                                                                                                                                                                                                         | inflammation related                                                        |                   |              |                                                                         |  |      |
|                                            |                                                                                                                                                                                                                                                                                                                     | Adult male SD<br>rats / T12-T13<br>contusion      |                                                                                                                                                                                                         | miR-1<br>miR-124<br>miR-129-1<br>miR-129-2<br>miR-146a<br>miR-21<br>miR-223 |                   | ↓ 4, 14 days | N/A<br>SOX2<br>CDK-6<br>CDK-7<br>IL-6;IL- 8;IL-1β;TNFα<br>nestin<br>N/A |  | [27] |
|                                            |                                                                                                                                                                                                                                                                                                                     |                                                   |                                                                                                                                                                                                         |                                                                             |                   | ↓ 14 days    |                                                                         |  |      |
| ↑ 4 days                                   |                                                                                                                                                                                                                                                                                                                     |                                                   |                                                                                                                                                                                                         |                                                                             |                   |              |                                                                         |  |      |
| ↑ 4, 14 days                               |                                                                                                                                                                                                                                                                                                                     |                                                   |                                                                                                                                                                                                         |                                                                             |                   |              |                                                                         |  |      |
| ↑ 14 days                                  |                                                                                                                                                                                                                                                                                                                     |                                                   |                                                                                                                                                                                                         |                                                                             |                   |              |                                                                         |  |      |
|                                            |                                                                                                                                                                                                                                                                                                                     |                                                   |                                                                                                                                                                                                         |                                                                             |                   |              |                                                                         |  |      |

|                                                     |                                                                                                                                            |                |                                                                                                                                                                                                                                                                                                                                                                                           |                                                                                                                                                                                                                                                                                                                                                                                                                                                                                                                                                                 |      |
|-----------------------------------------------------|--------------------------------------------------------------------------------------------------------------------------------------------|----------------|-------------------------------------------------------------------------------------------------------------------------------------------------------------------------------------------------------------------------------------------------------------------------------------------------------------------------------------------------------------------------------------------|-----------------------------------------------------------------------------------------------------------------------------------------------------------------------------------------------------------------------------------------------------------------------------------------------------------------------------------------------------------------------------------------------------------------------------------------------------------------------------------------------------------------------------------------------------------------|------|
| Adult female<br>Wistar rats / T8<br>contusion       | miR-29b<br>miR-7                                                                                                                           | ↓ 3 days       | MCL1 activate p53 pathway<br>EGFR-regulating AKT pathway<br>BCL-2, HSP60, HSP70, IGF1<br>SIRT1, BCL-2<br>PRKCZ<br>BCL-2<br>cdc42, SOX3<br>In quiescent microglia<br>NF-κB<br>PTPPF, CASP-9, BCL-W, MCL-1<br>PTPRF<br>TNF-α<br>MCL-1<br>BIM<br>FOXO1, CASP-3, FADD<br>IKK α<br>T-cells<br>BCL-2<br>BIM, E2F1, PTEN, TGFB2, PSMAP2, SMAD4<br>IL10<br>TPM, PTEN, PDCD4<br>TRAF-6, IRAK1, FAS | pro-apoptotic role<br><br>inflammatory related<br>associated with immune cells<br>anti-inflammatory related<br>pro-apoptotic and anti-apoptotic role<br>cell death<br>anti-inflammatory related<br>pro-apoptotic role<br>anti-apoptotic role<br>associated with immune cells and anti-inflammatory related<br>associated with immune cells<br>pro-apoptotic role<br>anti-apoptotic role and pro-inflammatory related<br>pro-inflammatory related<br>anti-apoptotic role, pro and anti-inflammatory related<br>anti-apoptotic role and anti-inflammatory related | [11] |
|                                                     | miR-1<br>miR-34<br>miR-148b<br>miR-138<br>miR-let-7g<br>miR-124<br>miR-9<br>miR-133b<br>miR-341<br>miR-125b<br>miR-101<br>miR-10<br>miR-96 | ↓ 3, 7 days    |                                                                                                                                                                                                                                                                                                                                                                                           |                                                                                                                                                                                                                                                                                                                                                                                                                                                                                                                                                                 |      |
|                                                     | miR-223<br>miR-142<br>miR-15b,                                                                                                             | ↓ 7 days       |                                                                                                                                                                                                                                                                                                                                                                                           |                                                                                                                                                                                                                                                                                                                                                                                                                                                                                                                                                                 |      |
|                                                     | miR-17-92                                                                                                                                  | ↑ 1, 3, 7 days |                                                                                                                                                                                                                                                                                                                                                                                           |                                                                                                                                                                                                                                                                                                                                                                                                                                                                                                                                                                 |      |
|                                                     | hsa-miR-106a                                                                                                                               | ↑ 3 days       |                                                                                                                                                                                                                                                                                                                                                                                           |                                                                                                                                                                                                                                                                                                                                                                                                                                                                                                                                                                 |      |
|                                                     | miR-21                                                                                                                                     | ↑ 3, 7 days    |                                                                                                                                                                                                                                                                                                                                                                                           |                                                                                                                                                                                                                                                                                                                                                                                                                                                                                                                                                                 |      |
|                                                     | miR-146a                                                                                                                                   | ↑ 7 days       |                                                                                                                                                                                                                                                                                                                                                                                           |                                                                                                                                                                                                                                                                                                                                                                                                                                                                                                                                                                 |      |
|                                                     |                                                                                                                                            |                |                                                                                                                                                                                                                                                                                                                                                                                           |                                                                                                                                                                                                                                                                                                                                                                                                                                                                                                                                                                 |      |
|                                                     |                                                                                                                                            |                |                                                                                                                                                                                                                                                                                                                                                                                           |                                                                                                                                                                                                                                                                                                                                                                                                                                                                                                                                                                 |      |
|                                                     |                                                                                                                                            |                |                                                                                                                                                                                                                                                                                                                                                                                           |                                                                                                                                                                                                                                                                                                                                                                                                                                                                                                                                                                 |      |
|                                                     |                                                                                                                                            |                |                                                                                                                                                                                                                                                                                                                                                                                           |                                                                                                                                                                                                                                                                                                                                                                                                                                                                                                                                                                 |      |
|                                                     |                                                                                                                                            |                |                                                                                                                                                                                                                                                                                                                                                                                           |                                                                                                                                                                                                                                                                                                                                                                                                                                                                                                                                                                 |      |
|                                                     |                                                                                                                                            |                |                                                                                                                                                                                                                                                                                                                                                                                           |                                                                                                                                                                                                                                                                                                                                                                                                                                                                                                                                                                 |      |
|                                                     |                                                                                                                                            |                |                                                                                                                                                                                                                                                                                                                                                                                           |                                                                                                                                                                                                                                                                                                                                                                                                                                                                                                                                                                 |      |
| Adult female<br>ICR mice / T11<br>contusion         | miR-486                                                                                                                                    | ↑ 7 days       | NeuroD6                                                                                                                                                                                                                                                                                                                                                                                   | neuroprotective role against reactive oxygen species-mediated apoptotic neuronal cell death                                                                                                                                                                                                                                                                                                                                                                                                                                                                     | [81] |
| Adult female<br>ICR mice /<br>T9,T10<br>transection | miR-125b-3p, miR-128a-pre, miR-137<br>miR-129-2-pre, miR-136, miR-135a,b                                                                   | ↓ 2 days       | N/A                                                                                                                                                                                                                                                                                                                                                                                       | N/A                                                                                                                                                                                                                                                                                                                                                                                                                                                                                                                                                             | [82] |
|                                                     | miR-20a                                                                                                                                    | ↑ 2, 7 days    | Ngn1, Ngn2                                                                                                                                                                                                                                                                                                                                                                                | motor neuron and myelin destruction                                                                                                                                                                                                                                                                                                                                                                                                                                                                                                                             |      |
| Adult female<br>SD rats / T10<br>transection        | miR-21                                                                                                                                     | ↑ 10 days      | PTEN                                                                                                                                                                                                                                                                                                                                                                                      | regeneration of corticospinal tract axons                                                                                                                                                                                                                                                                                                                                                                                                                                                                                                                       | [83] |
|                                                     | miR-199a-3p                                                                                                                                | ↑ 10, 31 days  | mTOR                                                                                                                                                                                                                                                                                                                                                                                      | factor in an intracellular signaling pathway that regulates protein synthesis, cell growth and proliferation                                                                                                                                                                                                                                                                                                                                                                                                                                                    |      |

|                                           |                                                                                          |                |                   |                                                                                          |      |
|-------------------------------------------|------------------------------------------------------------------------------------------|----------------|-------------------|------------------------------------------------------------------------------------------|------|
| Adult male SD Rats / T10 contusion        | miR-708, miR-125-3p                                                                      | ↓ 1 day        | N/A               | N/A                                                                                      | [84] |
|                                           | miR-let-7b, miR-210, miR-126, miR-24                                                     | ↓ 1, 3 days    |                   |                                                                                          |      |
|                                           | miR-410, miR-27b,miR-99a                                                                 | ↓ 3 days       | FaSL, PTEN, PDCD4 | anti-apoptotic factor                                                                    |      |
|                                           | miR-21                                                                                   | ↑ 1, 3 days    |                   |                                                                                          |      |
|                                           | miR-760-5p, miR-463, miR-473b, miR-291b, miR-336, miR-425, miR-134, miR-1188-3p, miR-539 | ↑ 1 day        | N/A               | N/A                                                                                      |      |
|                                           | miR-3591, miR-17-5p                                                                      | ↑ 3 days       |                   |                                                                                          |      |
| Adult female C57BL/6 mice / T10 contusion | miR-9, miR-219, miR-384-5p                                                               | ↑ 12 hours     | N/A               | oligodendrocyte differentiation and myelin maintenance                                   | [85] |
| BLOOD SERUM                               |                                                                                          |                |                   |                                                                                          |      |
| Adult C57BL/6 female mice / T10 contusion | miR-1285                                                                                 | ↓ 1, 3, 5 days | N/A               | N/A                                                                                      | [85] |
|                                           | miR-4331                                                                                 | ↓ 1, 3 days    |                   |                                                                                          |      |
|                                           | miR-146a-5p,miR-155                                                                      | ↑ 3, 12 hours  |                   | oligodendrocyte differentiation and myelin maintenance                                   |      |
|                                           | miR-9                                                                                    | ↑ 12 hours     |                   |                                                                                          |      |
|                                           | miR-219, miR-384-5p                                                                      | ↑ 1 day        |                   | N/A                                                                                      |      |
|                                           | miR-1, miR-125b                                                                          | ↑ 1, 3 days    |                   |                                                                                          |      |
|                                           | miR-133b, miR-208b, miR-27b-3p, miR-133a-3p                                              | ↑ 1, 3, 5 days |                   |                                                                                          |      |
|                                           | miR-128, miR-130a, miR-378b-3p                                                           | ↑ 3, 5 days    |                   |                                                                                          |      |
| miR-133a-5p, miR-22-5p                    |                                                                                          |                |                   |                                                                                          |      |
| miR-let-7a, miR-let-7g, miR-301           |                                                                                          |                |                   |                                                                                          |      |
| Adult SD female rats / T9 contusion       | rno-miR-125b-5p                                                                          | ↓ 6 hours      | N/A               | negative regulator of p53 and p53-induced apoptosis                                      | [86] |
|                                           | novel_mir-803, novel_mir-513, novel_mir-2364                                             |                |                   | N/A                                                                                      |      |
|                                           | novel_mir-1945, novel_mir-1985, novel_mir-429                                            |                |                   |                                                                                          |      |
|                                           | novel_mir-154, novel_mir-4,                                                              |                |                   |                                                                                          |      |
| Adult SD female rats / T9 contusion       | rno-miR-152-3p                                                                           | ↑ 6 hours      | N/A               | negative regulator of innate immune response and antigen presentation                    | [86] |
|                                           | rno-miR-130a-3p                                                                          |                |                   | substance P synthesis and release of mesenchymal stem cells (MSC)-derived neuronal cells |      |
|                                           | novel_mir-2064, rno-miR-126a-5p, novel_mir-39                                            |                |                   | N/A                                                                                      |      |
|                                           | rno-miR-466b-5p, rno-miR-1188-5p                                                         |                |                   |                                                                                          |      |
|                                           | novel_mir-603, novel_mir-51, novel_mir-1387                                              |                |                   |                                                                                          |      |

|                     |                         |         |     |                                    |      |
|---------------------|-------------------------|---------|-----|------------------------------------|------|
| Human / AIS A, B, C | miR-208, miR-499        | ↑ 1 day | N/A | Regulators of skeletal muscle mass | [18] |
|                     | miR-133a-3p             |         |     | N/A                                |      |
| CSF                 |                         |         |     |                                    |      |
| Human / AIS A, B, C | miR-23b-3p, miR-195-5p  | ↓ 1 day | N/A | N/A                                | [18] |
|                     | miR-9, miR-219, miR-10b | ↑ 1 day |     | Faslg                              |      |
|                     | miR-21                  |         |     |                                    |      |

SD – Sprague-Dawley rats; N/A – not available; AIS – American Spinal Injury Association (ASIA) Impairment Scale; SCI – spinal cord injury; CSF – cerebrospinal fluid.
